# Supplementary material
Source: PubMed Central journal article supplement (PMC2659759)
Supplement: NIHMS86094-supplement-Data_PDF.pdf [file NIHMS86094-supplement-Data_PDF.pdf]

## SUPPLEMENTAL FIGURE S1

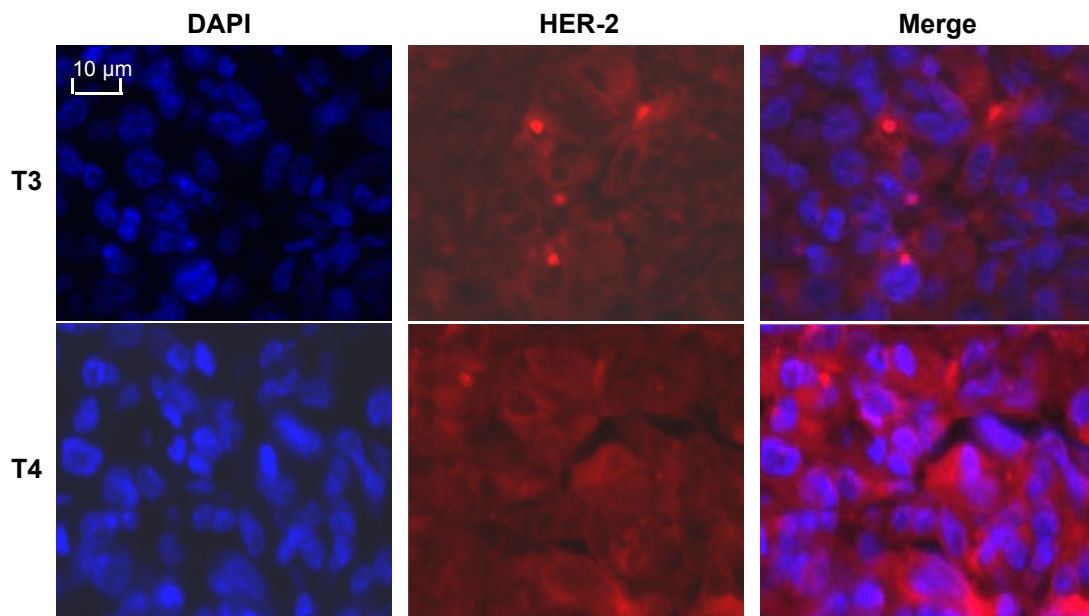

**SUPPLEMENTAL FIG. S1.** FIR increased HER-2 protein level in MDA-MB-231 xenograft tumors. The IHC staining of MDA-MB-231 xenograft tumors with anti-HER-2 antibody and DAPI was described as in Materials and Methods. The upper panel is tumor No. 3 (T3) and the lower panel is tumor No.4 (T4) indicated in Fig. 1G.

**SUPPLEMENTAL FIGURE S2**

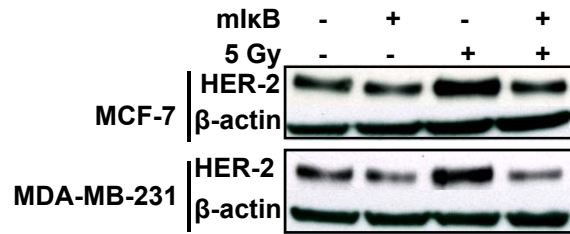

**SUPPLEMENTAL FIG. S2.** HER-2 was inhibited in cells transfected with mutant *I $\kappa$ B $\alpha$*  before 5 Gy or sham IR. Cell lysates were prepared 24 h post irradiation for Western analysis with antibodies mentioned.

### SUPPLEMENTAL FIGURE S3

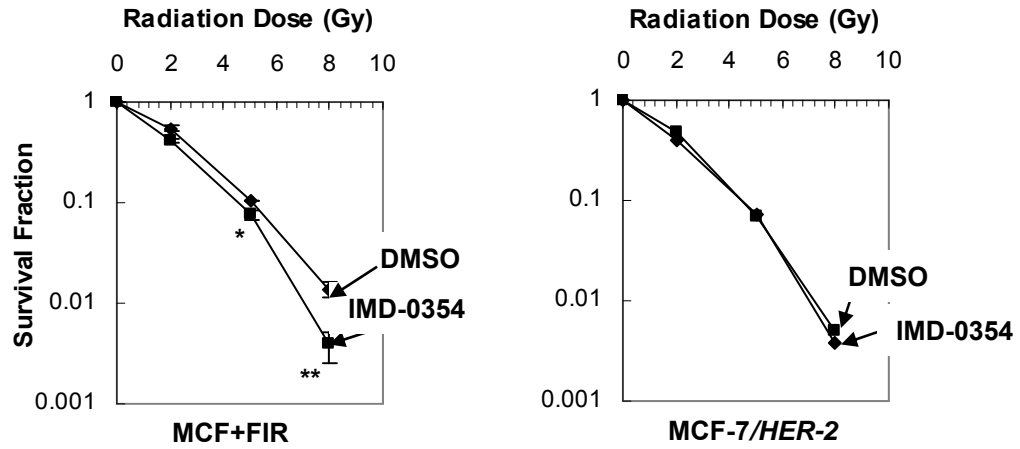

**SUPPLEMENTAL FIG. S3.** Radiosensitization of *HER-2* overexpressing cells by NF- $\kappa$ B inhibitor. Panel A and B: MCF+FIR (panel A) and MCF-7/*HER-2* (panel B) cells treated with IMD-0354 (2  $\mu$ M for 5 h) or DMSO were irradiated with an array of IR doses, and radiosensitivity was determined by clonogenic survival as described in Materials and Methods (Points, mean; n = 3; bars, SE; \*\*P<0.01, \*P<0.05 compared to DMSO treated cells).
